# Supplementary material
Source: Springer Nature journal article supplement (https://www.springermedizin.de/resource/supplementary/12879_2009_996_MOESM2_ESM.pdf/9441938)

# Relative risk of extrapulmonary tuberculosis

Black vs non-black:  
men

Black vs non-black:  
women

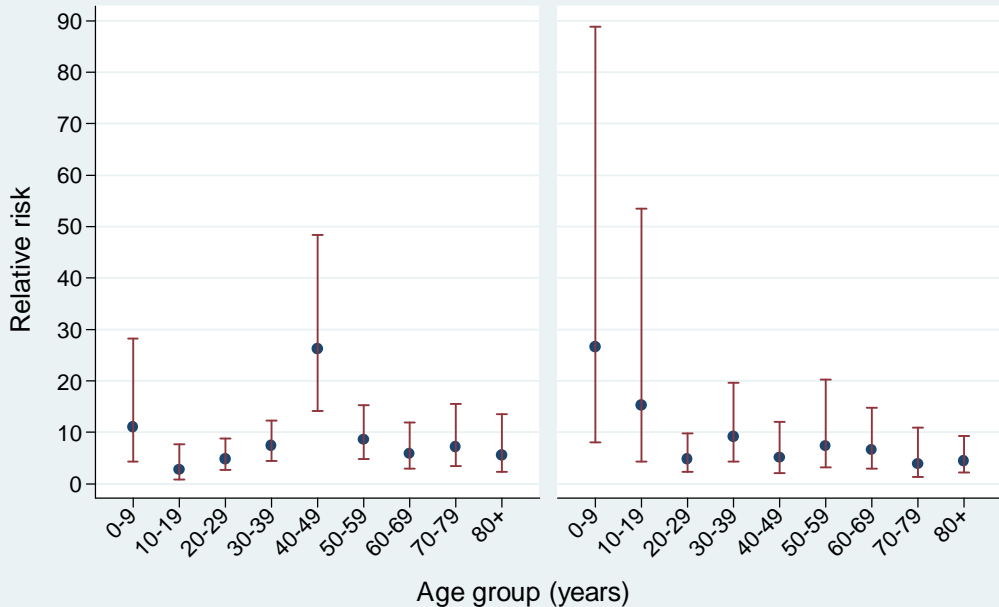

Supplement: MOESM2 [file 9441938]
